# Supplementary material for: Does carrying heavy loads impact ground reaction forces and plantar pressures in intervention police officers?
Source: PeerJ journal article supplement (doi:10.7717/peerj.16912), 2024-02-23
Supplement: Raw_data_PeerJ.xlsx [file Raw_data_PeerJ.xlsx]

## Sheet: List1
Loading condition (0=no load; 1=5-kg load; 2=25-kg load; 3=45-kg load)	MaximumforceFL	MaximumforceFR	MaximumforceML	MaximumforceMR	MaximumforceHL	MaximumforceHR	MaximumpressureFL	MaximumpressureFR	MaximumpressureML	MaximumpressureMR	MaximumpressureHL	MaximumpressureHR
0	875.9	888.3	199.9	294.8	552.1	515	48.7	60.9	10.4	9.5	49	47.2
1	901.5	941.1	244	323.3	573.3	551.6	46.3	58.2	17.7	11	50.3	51.1
2	945.2	1010.2	263.4	380.2	593.9	541.2	50.6	57	13.3	11.5	52.3	48.3
3	985	996.8	280.2	364	624.9	517.1	52.3	64.5	13.5	14.1	53.2	45.6
0	1051.9	982.3	184.2	185	662.6	620.7	49	44.3	29	35.2	34.2	32.5
1	1102.4	1044.2	194.5	191.8	703.8	646.9	48.4	44.3	31.8	35.6	35.5	33.4
2	1181	1102.8	189.1	227.5	753.9	666.6	50.8	47.4	35.6	38.3	36.3	33.5
3	1063.3	985.2	213.3	231.2	712.9	650	48.9	46.1	30.1	36	35.9	34.4
0	735.2	759.9	243.9	250.6	474.2	484.4	63.3	66.8	23.9	27.5	38.1	33
1	786	706.4	285.4	256.8	462.9	479.4	61.6	68.6	25.4	26	33.3	32.6
2	872.9	854.6	271.6	269.2	547.2	540.9	69.6	81.9	24.6	31	42.9	38.8
3	877	812.4	299.5	303	468.6	491.3	65.6	77.4	28.8	33.1	35.2	31.8
0	818.8	888.1	97	114.2	649.7	663.1	45.7	43.8	11.8	18.8	35.4	33.7
1	837	829.6	94	194.9	676.2	464	47.3	62.2	11.7	24.8	36.1	24.6
2	897.5	972.5	116.9	139.7	728.6	734	45.3	58.5	17.8	15.6	37.6	36
3	920.5	978.3	118.6	137.1	761.2	738	48.3	70.5	15.1	15	40.8	36.4
0	854.4	911.3	138.2	199.4	568.3	557	36.3	33.1	8	10.6	46	59.4
1	894	935.3	169.7	207.8	589.8	530.7	36.7	33.9	9.3	10.9	46.9	47.3
2	942.7	1038.6	175.4	207.2	603.8	607.4	37.3	36.2	10	11.8	48.3	53.1
3	990	1066.6	163.1	220.7	663.2	610	39.8	36.3	9.9	12.9	50.2	50.3
0	772.5	775.4	102.7	155.6	553.8	513.8	53.1	53.9	10.6	11.4	31.8	28.3
1	817	803.4	103.2	162	600.4	544.9	54.5	57.6	10.8	11.8	33.7	30.2
2	580.9	897	115.2	237.1	649.5	662.4	60.8	68	11.6	19.3	36.2	39
3	891.8	880.4	126.6	183.9	673.6	647.9	62.8	66.3	11	11.9	37.5	36.3
0	883.5	897.9	85	92.6	703	668.8	47	49.4	11.9	9.9	38.8	41.3
1	943.5	945.7	82	77.6	740.8	714.5	48.9	49.5	10.9	9.1	41	43.2
2	1051.2	1036.9	158.3	141.6	778.8	757.4	57.3	52.2	14.3	13.1	41.9	44.6
3	1044.9	939.9	94.1	159	786.6	681.1	49	50	13	16.9	43.9	46.8
0	790.7	893.5	224.1	102.4	579.6	556.6	46.2	48.9	30.7	14.3	48.9	44.3
1	864.3	959.3	214.4	122.9	596.1	606.4	44	51.8	37.1	16.4	49.6	46.8
2	941.7	1038.9	218.9	200.8	605.7	620	46.3	44.5	34.1	27.3	49.6	47.3
3	947	1025.7	248.6	181.5	634.4	635.8	45.7	48.6	40	20.4	50.8	47
0	752.7	782.8	138.6	132.7	591.2	490.3	38.4	41.4	20.8	14.3	32.1	27.9
1	833.9	829.1	109.7	115.2	615.4	560.7	37.7	45.3	16.6	13.8	32.2	30.9
2	903.9	889.2	149.9	155.8	644.9	578	42	40.8	18.5	15	34.4	29.3
3	762	907.7	173.7	155.4	642.3	584.3	38.1	41.6	20.4	16.1	35.3	31.1
0	882.6	930.1	167.6	201.5	526.4	562.8	55.6	32.9	16.8	18.3	21.1	22.9
1	901.5	968.8	219	169.9	525.3	604.7	60.7	33.8	23.9	17.3	21.8	24.2
2	966.7	1012.6	194.9	218.6	598.4	573.5	55.1	34.1	20.3	18.7	24	24.8
3	983.4	837.6	224.3	243.6	588.1	572.1	59.8	36.9	20.5	23.9	23.8	25.5
0	780.4	669.6	100.4	99.6	454.6	442.5	47	41.7	14.6	13.9	26.8	30.3
1	828.3	777.3	101	83.6	456.8	440	53.6	42.3	16.4	13.5	29.4	27.8
2	933.4	915.1	63.1	98.9	574	522	52.7	56.1	10.8	12.7	31.1	32.9
3	974.7	969.1	83	98.7	575.7	526.5	57.7	56.1	11.4	11.6	33.1	33.3
0	888.4	878.4	167.3	177.1	602.9	550.8	42.4	48.1	15.8	14.1	35.3	27.3
1	922.5	898.4	175.9	180.1	605.2	570.4	41	48.3	19.3	15.8	30.4	28.8
2	1000.8	996.8	183.7	193.1	702.2	656.6	39.8	49.5	20.8	24.4	36.3	32.4
3	1009.9	1020.4	204.9	202.5	682.9	692.1	43.1	49.2	19.6	20.9	36.8	33.4
0	837.2	861.5	249.3	222.1	517.3	532.4	35.2	48.3	18	15	27	29.6
1	884.6	886	248.3	260.6	550.7	532.1	35.6	46.3	18.8	20.1	29	29.3
2	925.6	938.6	253.9	250.8	583.1	584.6	37.4	49.8	18.4	18.1	29.5	31.5
3	948.8	986.6	286.1	274.1	556.5	576.6	39.7	61.1	18.5	14.2	29.2	32.3
0	874.1	914.6	250.3	265.1	573.9	549	47.7	42.8	13.8	15.2	29.9	27.4
1	935.1	933.5	239.5	251.1	607.6	546.7	44.1	41.8	12.8	15.6	31.2	27.1
2	995.8	998.7	257.1	272.1	664.8	572.7	44.3	43.4	13.9	17.7	34.3	28.2
3	1021.1	1014.7	280	292.4	651	566.9	41.4	46.4	15.8	17.5	32.8	27.7
0	879.9	907.5	120.4	88.8	646.6	635.4	37	35.3	14.3	12.9	30.8	30.8
1	843.2	724.5	136.1	143.5	614.6	441.4	36.4	32.7	17.2	15.2	30.1	22.4
2	986.7	999.2	139.9	113.7	662.1	658.4	38.6	37.1	16.1	15	31	30.9
3	998.3	956.2	146.6	121.2	686.7	641.3	39.3	37.3	16	15.6	31.9	30.7
0	827.9	853.4	163.5	221.6	617.1	636.4	29	28.8	13.9	15.8	30.8	31
1	865.7	893	181.9	196.1	623.8	693.1	32.7	28.9	16.7	14.9	30.3	33.4
2	951.6	989.3	174.6	237.7	662.9	708.3	32.3	32.6	12.5	16.5	32.9	33.5
3	988.1	1021.8	126.1	230.8	687.6	773.5	42.9	34.5	10.1	15.4	32.6	38.5
0	850.6	846.6	198.6	223.7	652.3	603.8	36.6	43.2	11.4	10.3	35.8	37.2
1	852.2	863.3	221.1	236	650.2	606.1	39.2	42	11.2	11.3	35.6	36.2
2	897.1	911.9	216.8	246.8	698.6	621.8	47.2	43	12.3	12.8	36.5	34.9
3	947.3	949.1	238.4	272.5	708.8	611.7	37.3	44.7	14.1	13.2	34.8	36.5
0	989.3	900.3	350.1	380.2	581.4	468.2	70.8	48	22.5	16.1	22.8	19.8
1	1001.8	1048	371	404.4	559.3	548.2	65.2	52.1	25.6	17.5	22	21
2	1098.7	1167.2	395.7	471.5	667.4	602.1	79.8	63	23.1	18.9	25.7	22.9
3	1107.6	1188.4	426.3	471.2	678	640.7	74.8	60.8	23.8	19.9	26	23.6
0	878.2	826	198.2	220.9	662.4	647.5	39.4	46.8	18.3	17.2	30.7	31.8
1	869.4	887.6	217.7	246.6	664.9	581.6	37.5	45.7	20.3	17.1	30.9	28.2
2	902.7	799.2	243.1	271.1	715.9	576.5	37.8	46.2	21.3	18.7	34.8	29.2
3	904.6	851.6	222.8	255.6	713.3	605.7	39.1	48.8	19.8	20.9	34.1	32.4
0	771.8	749.4	194.8	209.2	484.8	460.1	46.3	56.4	14.7	14.8	28.1	25.3
1	789.8	761.8	211.8	193.7	469.3	473.6	36	51.4	19.2	16	26.3	25.8
2	838	818	266.2	251.9	482.1	464.9	49.3	48.9	24.1	17.1	26.4	25.2
3	876.3	853	260.5	242.6	536.8	500.7	41.6	51.7	18.6	17	30.1	27.5
0	1148	1174.3	218.8	217.5	716.4	723.8	39.8	42.4	11.2	17.3	30.6	28.9
1	1183.8	1303.2	229.9	239.1	750.5	708.8	41.3	42.4	13.1	15.7	31.9	28.3
2	1234.8	1256.2	232.4	242.3	826.7	762.1	41.9	44.1	13.1	18.6	35.6	30.6
3	1229.3	1277	238.8	200.4	807	804.7	41.4	43.3	13.8	14.3	34.4	32.2
0	868.5	854.6	89.6	107.4	676.4	612.1	48.3	52.8	9.9	9.4	35.5	33.3
1	894.3	882.6	111.7	106.6	678.8	641.3	48	52	12.8	12	35	34.8
2	976.3	941.5	107.1	114.5	753.2	676	47.2	49.6	12.8	11.5	35.8	37.6
3	998.1	949.6	95.4	113.7	829.9	721.8	49.9	48.4	12.5	17.5	42.2	40.9
0	900.2	890.3	141.5	135.1	560.8	532.2	43.9	34.9	12.7	16.1	26.2	26.4
1	941.6	928.3	143.1	153	596.6	559.1	45.2	39.8	14.5	22.3	26.9	28.4
2	880.2	903.5	179.1	247.1	607.9	527.1	43.2	38.3	16.2	23.8	28.3	30.4
3	1014.5	1010.9	177.3	167.5	636.9	624	47.3	37.5	15.8	18.5	28.1	32.8
0	782.3	809.6	93.2	74.1	587.2	579.7	47.9	39.1	13.5	11.3	35.4	53
1	655.2	791.7	119.9	60.9	571.3	594.4	42	39.9	19.8	8.1	33.6	57.3
2	913	895.3	116.8	81	767.1	622.1	48.9	40.4	23.8	10.3	39.8	55.4
3	886.9	937.4	93	130.3	675.5	633.3	49.8	39.4	17.5	17.3	40.6	52.7
0	731.8	740.2	81.2	108.1	539.4	502	34.3	53.9	8.5	12.9	34.4	35.8
1	769.8	773.5	100.1	127.3	552.1	540.8	34.8	50.4	13.9	10.8	34.8	35.8
2	835.5	858.9	107.9	147.8	605.5	569.5	40.8	53.3	11.5	10.3	36.4	39.4
3	855.7	881.4	123.3	145	598.6	550.5	39.4	54.5	18.4	12.9	35.9	37.9
0	796.8	812.1	128.7	149.5	502.6	511	42	54.4	20.6	16.8	21.8	22.2
1	815.4	846	149.7	182.6	538.6	505.8	36.8	48.6	23.2	22.5	23	21.3
2	800.5	884.3	180.3	200.4	516.1	516.1	40.2	53.6	19.9	20.1	22.4	22
3	899.4	908.4	194.4	233.6	545.6	519.6	39.8	52	19.1	25.3	22.7	21.3
0	744.3	714.5	208.3	297.4	571.2	459.8	30	36.2	13.7	19.3	33	26.3
1	751	750	306.3	265.4	565.8	526.3	33.5	38.8	22	17.1	31	28.8
2	801.6	800.1	324.4	298	621	586.8	36.5	39.5	21.5	17.8	33.3	31.8
3	813.7	794.2	311.7	309.2	628.2	568.8	32.8	38.8	21.3	19	35.1	29.9
0	799	775.5	142.9	124	554.8	542.5	31.1	28.5	15.3	13.3	29.5	29
1	842.2	798.4	163.6	153.4	607.4	576.1	32.3	30.7	17.2	16.8	32.2	30.8
2	885.1	811.1	212.6	166.6	621.2	566.7	33.8	33.2	20.8	18	32.7	30.3
3	919.2	905.5	197	151.6	661.9	619.6	34.1	32.1	19.3	15.8	34.9	32.3
0	795.2	869.1	161.4	163.7	577.9	527.9	34.1	36.3	17.2	11.3	31	29.7
1	892.5	791.4	164.1	236.6	611.6	541.8	36.9	38.7	13.1	16.9	32.8	30.7
2	985.7	1000	169.1	197.5	637.7	594.4	38.8	41.8	18.9	12.7	33.6	34.3
3	989.2	1011.6	170.3	225.5	361.6	607.1	39	41	16.2	14	33	32.8
0	1042.3	1037.1	116	99.2	820.3	771.5	45.4	40.1	13.5	16	46.3	51.7
1	1056.3	1039.5	126.4	119.5	805.4	760.4	44.3	40.8	15.5	21.6	43.3	43.8
2	1136.7	1090	124.4	130	928.3	712.7	46	40.6	16.8	19.1	47.9	44.1
3	1130.3	1152.1	128.4	85.9	901.2	841.1	45.3	39.8	15.6	15	47.1	48.1
0	933.1	949.3	95.6	123.4	728.8	708.8	53.3	40.3	8.3	11.1	31.8	33.3
1	960.5	982.5	120.6	117.1	747.3	725.8	51.7	40.3	8.5	9.2	32.2	34.3
2	1042	984.2	141.1	179.8	795.7	655.4	42	45.6	13	15	34.9	32.5
3	1074.2	1010.8	206.1	199.7	792	649.2	38.5	45.3	35.8	19	33.7	30.9
0	898	894.6	119.8	137.6	645.8	637.9	45.6	30.3	14.9	17.6	38.4	34.6
1	938	934.6	145.4	105.3	669.3	683.2	40.5	40.3	16.9	17.5	38.8	36.3
2	1004.5	991	119.9	153.7	724.8	744.7	44.1	38.3	16.3	19.9	40	39.8
3	999.2	1023.1	143.1	205.1	702.8	715.6	43.6	34.7	16.7	18.1	38.7	38.3
0	820.1	829.5	226.2	157.7	647.6	659.4	46	34.6	14.7	12.5	33.3	34.8
1	844	857.3	230.2	166.9	638.3	699.3	46	36	15.4	13.8	34	37
2	926.3	959.9	244	190.2	666.9	708.3	47.8	36.3	15.6	14.8	33	36.1
3	909.7	928.2	286.1	184.5	678.9	723.7	50	37.8	16.4	15.8	33	34.8
0	1061.5	1090.8	175.2	132.5	746.3	788.7	51.9	54	18.4	8.4	38.4	35.6
1	1116.5	1127.7	157.7	132.2	794.8	782.9	59.7	55.3	12.7	8.4	40.3	36.8
2	1173	1181	144.6	241.8	790.1	815.1	57.2	58.4	13.9	13.6	39.4	35.4
3	1174.5	1200.2	156.8	238.2	847.6	832.4	56	58.1	14.5	12.1	40.8	35.3
0	966.1	945.3	230.5	253.7	610.7	599.1	29	57.8	11.2	9.8	25.1	22.7
1	16.4	962.7	198.5	229.3	624.6	608.1	31.8	56.5	10.1	9.8	25.4	22.3
2	1050	1050.8	243.2	315	602.8	622.8	37.4	61.3	12.4	14.1	24.5	22.5
3	1040.7	1061	271.3	226.8	636.6	674.6	37.8	59.6	13.8	10.5	25.3	24.4
0	934.5	955.5	197.6	246.6	631.7	503.3	45.3	33.3	30.3	18.2	32.1	25.3
1	983.2	987.2	198	279.6	578.39	523.7	44.3	35.1	26.8	23.9	28.5	26.9
2	1053.2	994.1	239.5	314.6	617	526.5	49.2	38.8	33.3	28.5	30.8	27.2
3	1106.8	1069.1	192.6	307.9	638.8	606.3	43.8	43.1	14.3	31.2	31.3	30.4
0	955.6	942.8	283.3	267.4	627.9	594.9	40.8	38.5	15.5	17.3	35.6	31
1	945.6	873.1	275.7	262.5	581.7	577	40.8	39.1	15.3	18.6	32.4	30.9
2	1043.5	1008.8	276.9	271.4	672.5	615.5	43.7	39.4	15.8	17.8	36.4	31.3
3	1049.4	1036.5	338.4	287.4	671.5	636.7	44.5	41.7	19.6	19.9	36.2	32.3
0	1074.2	1067.8	250.8	218	614.2	653.3	32.3	30.5	12.9	15.7	32	30.1
1	1074.6	1114.5	232.1	189.5	646.2	687.5	32.7	31.1	14.4	15	31.6	33.2
2	1175	1184.1	245	22.4	653.2	690.7	38.7	35.5	14	15.4	32.6	35.1
3	1170.3	1201.8	280.1	274.6	665.5	718.7	34.4	32.9	15.3	17.8	31.1	34.8
0	1074	1038.1	291.1	195.1	524.7	655.5	44	46.6	17.3	13.9	27.2	29.9
1	1128	1147.3	253.3	207	690.8	689.5	41.7	48.9	14.4	12.1	29.4	30.9
2	1204.1	1221.5	318.6	205.9	745.7	688.8	43.7	49.2	16.8	12.7	31.6	36.7
3	1245.6	1230.5	194	254.9	791.6	790.3	48.3	50.6	10.4	14.6	42	36
0	857.8	892.5	125.8	143.7	573.7	553.1	42	37.6	23.3	23.5	33.2	35.8
1	884.3	733.6	105.5	205.9	613	449.4	39	36.6	18.9	19.9	34.1	32.4
2	953.8	864.4	114.6	217.8	657.8	543.3	40.7	38.8	21.1	21.7	36.6	36.2
3	845.5	1008.1	183.3	123.5	595.3	613.3	41.5	42.1	25.7	19.7	37.6	36.4
0	832.4	853.4	102.9	231.6	662.4	648.2	39.8	42.9	11.2	12.7	36.3	27.3
1	866.9	889.9	99	218.8	697.8	640.2	39.7	43.8	11.5	12.8	39.3	26
2	890.5	994.8	188.1	253.8	737.2	699.2	43.1	46	16.5	13	40.7	28.9
3	934.1	998.1	151.2	277.5	768.9	721.8	43.8	43.8	15.4	14.9	42.3	29.3
0	869.4	795.8	232.4	243.1	962.8	602.4	32.3	31.9	16.5	19.2	29.3	26.7
1	757.1	824	232.6	246.5	538.9	606.3	33	33.4	17.7	19.2	24.5	26.2
2	929.1	883.5	334.2	280.5	683.7	630.2	33.2	33.6	19.6	20.4	28	27.7
3	948.7	846.1	293.2	293.6	665.6	662.1	34.9	32.8	19.1	22.3	28.1	29.3
0	719	864.4	166.4	188.7	533.5	471	32.9	47	25.3	16.5	25.8	23.3
1	873.9	926.6	135	167.8	641.8	565.3	36.5	44.8	24.8	12.8	29.7	26.8
2	965.1	995.2	180.9	167.7	610.8	657.7	38.6	45.4	30.4	15.4	27.6	31.5
3	957.6	991.4	186.4	175.6	621	635.4	39.9	43.3	34.3	16.3	29.2	30.8
0	913.6	881.6	163.4	236.2	639.9	638.3	58.8	40.5	9.9	14.6	28.3	27.4
1	938.3	869.4	214.5	203.9	678	621.8	50.6	48.6	13.6	13.9	29.9	27.8
2	937.2	937.7	256.7	282.3	627	633.2	56.3	41.7	15.6	17.8	30.1	28.6
3	1006.9	986.7	224.9	227.9	749	703.3	56.6	43.6	14.8	14.8	33.4	30.1
0	750.1	724.1	87.7	131.5	524.3	473	44.1	46.3	8.8	11.3	32.9	28.9
1	759.8	767.4	94.5	124	527.8	484.3	44.6	57.9	9.6	9.9	32.5	29
2	838.3	801.6	104.7	186.7	578.9	448.1	44.9	55.5	11.3	15.6	35.8	28.5
3	820.5	840.9	110.3	168.8	607.2	537.5	45.1	56	11.5	12.1	36.4	32.6
0	719.6	683.8	124.9	151.9	491.14	409.8	30.3	29.9	13.6	16.7	26.3	24
1	725.4	690.7	85.9	141.1	483.8	473.5	31.9	27.8	12.6	17.2	25.6	27.5
2	820.2	779.5	142	132.1	546.5	482.1	35.8	35.8	15.6	17.9	28.9	27.8
3	905.9	902.5	71	67	616.9	566.4	34.9	31.3	13.5	15	29.3	28.8
0	697.1	578.8	24.6	58	419.2	371.4	28	25.7	7.6	13.3	22.8	19.1
1	709.8	597.9	23.5	92.7	432.5	364.8	32.3	27.6	7.8	12.1	23.3	22.1
2	787	770.3	56.5	48.3	456.3	459.1	34.1	29	12.1	9.4	23.3	23.3
3	811.5	683.3	32.6	79.8	465.2	388.3	32.3	27.3	9.8	11.6	24	21
0	871.6	892.9	168.9	152.3	651.4	687.6	54.9	49.3	18.3	19.5	28.8	29.6
1	918.4	937.7	164.6	137.4	646	704.5	46.9	53.7	17.3	20.5	27.9	30.4
2	985.9	986.4	153	199.9	715.5	730.7	44.5	58.9	18.4	28.3	30.8	31
3	985.6	1005.2	154.5	232.4	707.3	748.4	48	60.2	21.5	21.9	30.3	32.8
0	1019	1015.3	181.7	248.4	720.5	639.8	35.9	41.2	15.9	16.2	31.7	29.8
1	1018.8	1033	205.4	229.4	701.2	626.8	36.4	38.9	17.1	15.4	30.8	27.8
2	1151.2	1142.7	194.6	254.6	703.7	641.9	38.6	44.8	15.3	18	30.3	30.1
3	1149.1	1131.6	231.2	257.2	727.6	686.8	39.7	42.5	15.9	18.5	31.4	31.4
0	905.4	976.2	381.5	363.5	522.9	567.3	62.9	50.2	23.2	20.7	25.7	24
1	8.9	1035.8	371.8	356.8	565.7	590.5	47	48.3	21.1	23.8	26.8	26.4
2	1061.7	1082.4	355.8	353.1	621	629.5	53.6	49.1	22.7	19.8	30.5	26.8
3	1073.8	1088.9	370	347.2	591.8	586.1	54.2	48.2	25.5	22	34.5	28.4
0	748.8	601.8	76.3	166.3	525.1	429	43.1	32.6	20.5	22.3	29.5	29.5
1	791.1	795.1	76.9	85.3	543.1	536.8	46.5	34.4	18.9	17.1	30.1	29.8
2	861.7	863.4	85.2	108.3	563.3	563.4	41.4	38.3	19.4	20.9	30.6	32.2
3	782.1	823.3	166.2	181.4	545.2	477	43.7	35.3	26.1	21.8	32.6	29.9
0	891.6	913.1	225.5	200.8	544.2	567.5	44.2	40.6	23	19.1	21.3	23.3
1	936.6	964.5	231.5	25.6	586.6	568.2	37.8	44.4	23.8	18.7	23.7	23.7
2	1039.7	1048.2	240.3	210.7	611	620.7	38	45.1	23.4	19.8	24.6	25.3
3	1042.2	1066.1	262.4	224.2	631.5	604.7	38.1	45.8	25.6	19	24.9	24.4
0	710.9	881.1	123.8	76.9	492.6	557.2	59.8	56.7	18.3	16.5	31.3	33.9
1	807	815.6	86.7	119.2	589.3	468.3	53.8	57.8	17.3	16.6	35.3	30
2	777.3	874.8	107.8	160	585.1	520.9	48.1	53.2	20.1	23	36.3	31.3
3	935.2	948.8	109.2	138.8	546	532.8	66.5	51.3	18.1	19.1	31.8	32.6
0	815.2	856.4	257.8	230.3	472.9	458.9	57.3	52.9	29.8	29.1	60.7	32.1
1	822.6	880.7	288.1	266.3	488.8	448	55.1	62.3	29.8	27.6	53.5	31.1
2	871.7	925.1	310.3	326.2	492.2	489.3	59.2	60.2	34.3	33.6	54.8	31.6
3	874.5	944.2	326	312.9	542.1	504.7	56.7	58.7	31.9	25.8	51	34.8
0	679.5	677.6	171.5	127	524.6	549.3	29.3	25.4	18.1	13.5	28.5	30.2
1	691.2	613.4	174.4	160.5	565	437.9	30.3	29	19.8	17	30.7	27.6
2	733.9	757	196.6	140.6	605.5	626.3	33	28	20.9	15.6	31.5	37.1
3	743.9	720.7	203.1	172.7	599.9	517.6	32.6	29	21.6	17.6	32.6	29.3
0	767.1	766.5	91.4	141.3	588.5	507.9	49.8	35.8	33.1	15.1	32.5	26.8
1	755.3	793.6	125.5	153	558.2	513	52.9	40.9	44.1	20.2	28.9	28.5
2	857.4	869.2	126.1	200.5	595.9	540.5	54	42.7	42.1	26.3	30.8	28.3
3	876.6	888	111.9	170.9	631.1	621.5	54	41.7	33.6	23.9	32.5	33.2
0	935.2	936.1	180.8	131.9	609.2	595.4	49.4	52.7	12.4	8.5	36	38.1
1	1006.5	957.4	173.1	98.9	615.6	632.7	46.8	54.5	13	8.1	35.7	38.9
2	1063.9	1067.1	188	135.4	657	670.6	47.5	58.1	13.1	9.5	37.9	39.5
3	1089	981.1	162.1	213.8	628.5	564.7	48.3	56.8	12	18.6	36.3	37.2
0	608.6	507.9	221.8	175.6	294.5	384.2	57.3	48.5	17	25.3	24.8	31.3
1	837.8	694.4	102.6	94.1	514.5	473.1	55	56.4	10.5	15	40.2	33.4
2	934.7	799.7	132.1	97.1	562.9	539.5	55.8	59.1	15.8	16.5	44.7	37.9
3	952.9	836.3	106	84.6	555.8	600.9	61.3	62.7	9	11.4	44.6	43.3
0	669.4	612	74.9	100.3	476.7	394.1	39.9	50.2	15.5	15.7	37.3	32.5
1	686.8	500.1	39.4	174.3	462.3	286	48.4	45.6	7.4	22.9	33.1	28
2	669.2	694.4	109.2	55.8	428.1	509.7	46.4	52.2	12.4	16.3	33.2	40.1
3	670.3	744.1	59.4	162.8	519.3	358.6	45.6	46.8	12.3	22.8	37.3	31.4
0	877.2	858.3	119.4	199.9	609	563.3	38.9	39	14.4	15.8	37	36.3
1	867.4	933.7	172.3	165.1	573.1	593.7	39.1	52.2	22	14.9	34.3	36.3
2	1016.7	989.4	133.8	207.9	674.6	617.2	42.2	44.8	19.8	17.2	39	36.8
3	1027.8	1020.6	150.3	228	693.7	653.8	41.3	38.7	21.3	20.3	39.8	39.3
0	770.2	821.5	150.6	154	569.2	513.7	68.2	62.9	9.7	17.9	35.7	35.5
1	867.2	870.2	195.5	139.5	584.3	555.1	62.5	61.4	12	14.8	37	36.5
2	905.6	966.7	181.2	177.1	670.9	640	77	64.1	9	20.8	40.5	40.6
3	857	975.1	206.2	196.2	651.6	650.5	75.3	62.2	12.8	20.6	41	43.7
0	935.9	951.2	303.2	201.3	648.1	643	37.5	64.3	30.5	21.3	25.4	26.8
1	842.8	964.8	251.3	230.8	634	686.4	31.6	37.9	22.9	25.1	26	28.2
2	1048.8	1022.5	283.3	246.9	686.5	693.4	36.5	40.5	27	22.8	25.8	27.2
3	1092.4	1077.6	231.5	214.4	721.8	735.3	35	42	20	21.5	27	29.3
0	761.2	793.7	167.3	172.8	508.4	536.6	41.4	46.4	18	14.5	27	27.9
1	799.8	809.3	166.2	201.5	536.2	571.6	42	43.9	15.7	16.8	28.1	30.8
2	769.9	895.5	176.2	206	525.1	602.7	37.4	44.7	20.2	18.8	28.5	30.4
3	895.9	912.3	169.2	208.3	573.3	625.7	46.3	52.2	13.2	16.1	30.6	33.9
0	780.1	769.5	185.8	221.5	577.9	548.1	40.1	31.2	17.6	21.3	37.1	34.3
1	789.3	785.9	161.7	225.8	602.4	580.7	37.8	32	15.6	19	35.8	34.3
2	833.4	858.1	138.6	253.3	658	586.7	37.7	37.7	13.2	24.2	38.5	33.2
3	854.3	827.4	190.5	218.3	622.5	656.6	32.5	31.4	19.3	23.1	36.1	36.8
0	863.5	851.6	105.8	117	619	596.4	53.7	51.7	13.5	11.5	37.8	29.4
1	877.9	871.7	46.5	101.5	643	595.3	51.3	52	11.9	9.9	38.7	29.7
2	963	863.1	72.7	143.7	691.2	588.9	55.7	49.4	12.8	15.5	42.1	31
3	979.5	956.2	65.4	148.6	695.8	683.9	58.4	55.1	12.9	13.8	42.1	33.9
0	1041.2	1054.1	132.9	79.7	778.9	739.9	36.6	37.2	13.8	10.3	32.9	29.3
1	1071.1	1097.1	146.4	47.3	819.7	825.4	38.9	36.5	13.4	7.4	33.9	33.4
2	1181	1191.4	122.9	54.7	919.8	895.2	38.3	37.7	13.1	11.5	37.9	36.9
3	1198.1	1193.6	142.3	39.3	894.6	903.1	38.3	38.4	12.8	10.7	36.2	36
0	611.1	888.1	241.9	275.3	552.9	530.3	28.3	57	23.3	15.6	32.3	32.9
1	954.5	930.4	279.7	255.9	604.2	608.7	40.3	72.7	22.1	14.2	35.4	40
2	1032.2	1019.8	270.7	294.8	719.4	682.4	44.3	73.8	20	15.8	42.9	42.5
3	1016.6	1012	327.7	310.5	700.7	643.1	41.6	72.1	21.8	16.9	39.6	41.3
0	934.2	930.6	23.2	24	610.2	653.7	37.5	41.4	8	8	33.7	37.1
1	833.2	957.9	100.1	29	520.4	645.5	33.9	49.1	12.8	9	25.2	40.5
2	1037.8	1076.1	35.4	31	617.2	692.1	35	43.2	8.4	9.5	28.7	39.8
3	1043.1	1056.4	20.3	36.3	670.2	694.4	36.4	48.8	9.4	9.6	30.6	38.9
0	825.9	849.9	219.8	226.9	583.8	534.7	48.5	54.1	24.3	20.3	48.4	47.8
1	827.6	880.4	228.6	248.6	602.9	570.1	49.4	53.4	27.5	21.7	48.7	46.3
2	926.8	952.7	235.8	262.3	640.2	628.3	49.6	57.1	27.1	19.2	52.5	47.3
3	925.9	964.4	253.1	297.1	676.5	634.4	55.7	57	18.3	19.9	52.3	47.4
0	981.5	1004.8	198	155	606	612.2	52.3	54.3	14.6	11.6	35.6	35.8
1	1006.1	1052.3	175.8	154.9	592.2	651.2	51.4	45.7	12	11.5	34	37.8
2	1060.9	1136.1	186.8	138.5	657.4	730.5	43.5	52.3	14.1	11.8	39	43.8
3	1080.4	1102.7	208.5	181.6	696.1	767.8	45.3	55.8	15.9	14.8	40.5	44.8
0	869	862.6	267	196.9	685.7	607.7	41.9	59.3	15	10	41	35.5
1	886.2	894.9	302.5	241.9	690.3	641.1	44.9	57.4	16.4	11.3	41.4	36.9
2	955.1	948.2	308.1	266.7	723	649.7	50.8	51.7	17.9	13.2	40.7	36.8
3	959.6	950.6	338.5	288.1	725.9	667.9	45.9	52.4	18.4	15.4	42	38.3
0	766.1	763.3	104.8	106.6	619.6	564.7	34.1	36	12.5	13.4	34	30.4
1	813.8	807.3	97.8	155	664.1	585.8	34.1	36.8	13.1	15.3	36	31.7
2	850	859	148.3	155.1	696.3	625.3	33.1	38	16	15	37.3	33.1
3	868.3	864.5	147.5	163.1	774	694.8	36.4	35.3	15.5	21.4	41.4	40.1
0	700	956.8	278.9	163.2	519.5	660.1	33.9	43	23.5	14.9	26.2	26.6
1	1250.7	1196.6	4.8	60.8	899.4	809.1	43.2	42.9	4	6.3	36.1	30.9
2	1120.8	1269.3	172.6	110	811.9	857.9	42.7	45.5	14.6	8.7	35.2	32.3
3	1294.8	1275.1	26.2	86.3	920.7	919.1	45.4	44	5.9	8.9	36	34
0	906.5	935.4	152.6	168.7	575.3	543.8	35.4	33.2	19.6	22.9	25.3	26.9
1	941.8	946.1	151.9	174.8	593.8	551.5	34	30.4	18.9	23.2	25.6	25.8
2	985.9	1006.1	214.2	174.6	609.5	576.8	36.5	31.8	23.6	22.3	25.6	26.3
3	1004.6	1033.9	250.1	194.4	641.7	603.3	35.2	35	26.2	27.2	26.6	27.8
0	640.5	786.5	162.7	76.5	419.3	484.2	43.5	50.6	22.3	17.3	33.4	28.7
1	825.5	827.9	46.6	33.4	554.2	523.6	49.9	57.1	16	10.1	38.1	31.6
2	933.6	796	62.4	132.4	644.7	521	53	61	20	20.3	47.7	35.3
3	941.2	923.7	54.2	56	658.6	628.1	52.8	58.1	17	12.8	47.6	39
0	925.7	972.7	64	76.4	663.5	641.4	48.1	46.6	14.3	12	44.6	36.8
1	993.3	1026.9	67.7	84	705.6	668.6	49.5	48.9	13.3	15.8	45.5	42.2
2	1053.1	1079.6	74.9	97.2	736	708.2	49.2	47.2	18.3	15.8	46.2	40.5
3	1062.5	1106.6	60.1	102.2	745.4	739.3	51.7	47.9	17.6	16.5	46.7	45.8
0	855.4	826.3	44.6	72.6	590.7	585.3	38.9	39.9	7.1	7.8	32.9	33.8
1	912.5	869.6	46.7	85.8	632.3	596	35	43.7	7.9	9.7	35.5	34.3
2	990.4	965	46.5	70.2	685.1	649.8	40.7	57.4	8.3	8.8	38.6	36.7
3	1048.8	970.5	48	86.6	687.5	617.6	48.5	57.4	8.5	8.9	37.6	34.4
0	714	839.1	234.5	146.4	431.8	517.6	41.1	43.1	19.6	19.5	27.5	29.7
1	903.8	909.3	123.9	172.2	580.4	600.2	37.2	41.2	13.8	21.3	33.6	33.8
2	882.9	902.5	150.1	214.1	564.1	539.7	41.3	42.7	19.9	25.1	35.1	29.9
3	943.1	989.4	216.4	171.4	625.8	588.7	45.4	48.2	23.6	18.6	37.4	35.9
0	807.3	820.1	180.1	159.9	512.4	452	39	41.9	15.6	13.7	36.1	29.1
1	860.7	853.5	118.4	156.9	539.3	486.1	36.8	42.4	11.1	14.5	36.8	31.8
2	947.7	979	160.2	182.1	566	543.4	39.8	44.3	13.8	15.6	37.7	35.1
3	932.1	970.3	199.4	165.1	604.1	507.2	41.3	44.5	16.5	14.8	40.2	32.2
0	865.2	879.1	142.3	195	627.9	604.3	51.8	58.4	10.8	11.1	31.4	32.5
1	917.1	913.8	163.5	214.7	669.8	608	50	54.1	12.7	12.9	33.9	32.1
2	958	994.7	216.8	213.1	703.7	648.8	50.4	56.6	15.3	12	35.5	35.5
3	976.8	1002.4	208.7	195.3	677.8	665.3	51.6	55.2	15.4	11.3	33.2	36.4
0	934.7	977.6	144.8	151.8	673.5	630.2	49.3	52.2	10.7	7.5	36	37.9
1	976.6	1004.1	172.7	134	691.1	661	47.8	46.1	11.8	7.5	38.5	41.4
2	1039.6	1077.5	183.6	189.2	688.5	606.7	46.7	51.8	14.8	10.8	37.5	36.8
3	1017.5	1055	257	183.4	688.1	615.8	47.5	49.4	20.1	11.1	35.3	38.5
0	844.8	903.2	171	82.5	545.3	570.2	35.1	39.8	20.6	9.8	27.6	31
1	874.3	942.6	177.7	95.1	569.8	565.9	35.8	44.1	23	10.3	28.7	29.7
2	957.7	1015.3	216	170.9	580.3	588.3	39	37.2	27.2	16.3	28.8	30.3
3	953.4	1031.3	244.2	150.6	584.9	598.8	38.7	35.8	30.7	15.8	29.1	30.6
0	967.3	1019.2	82.1	107.8	617.5	589.7	47.8	48.9	21.4	29.6	29.6	27.7
1	996.8	1032.9	94.5	116.4	618	634.6	44.7	51.9	24.3	28.9	28.8	28.6
2	1066	952.4	122.2	205.1	650.1	427.5	50.8	49.9	30.4	30.7	30	22.9
3	1096.3	1178.3	146.9	127.8	697.3	632.1	46.6	50.9	32.3	34.6	32.3	27.9
0	907.9	946.6	170.6	211.6	625.7	687	39.7	49.3	12	13.9	29.3	30.2
1	937.4	985.2	216.9	226.6	628.2	691.3	38.4	42.9	14.8	13.7	30	30.7
2	987.3	1045.5	233	240.4	628.5	727.2	36.1	44.8	17.7	15.1	28.7	31.4
3	1018	1031.7	253.4	231.5	651.5	745.4	37	52.1	21.2	15.2	30.1	31.9
0	988.1	1011.5	309.9	236.8	587.1	681.7	45.6	38.9	15.1	13.2	25	27.1
1	1022.4	1012.2	316.2	252.2	629.8	721.4	49.3	39.2	16.2	13.8	26.9	28.4
2	1108.3	1085.5	360.7	286.9	682.6	751.5	47.2	40.1	17.6	15.6	27.9	29.8
3	1090.6	1093.9	369.1	278.7	664.6	760.3	48.2	46	17.6	16.9	27.7	30.5
0	688.8	765.1	167	130.1	534.5	518.8	32.1	29.8	18.5	18	30.9	27.3
1	811.3	792.9	141.2	134.9	577.4	544.9	40.7	32.3	16.5	19.2	30	29.1
2	864	874.8	163.5	166.2	575.8	564.2	43.8	34.8	18.2	20.6	29.8	28.9
3	902.9	902.7	171.2	139.9	627	598.1	41.1	32.3	19.2	18.2	33.3	31.6
0	897.7	885.7	128.7	143.9	644.6	607.1	48.6	47.3	14.8	15.9	55.3	50.1
1	914.3	925	138.3	177.6	637.4	613.4	47.4	41	16.6	17.1	54.1	50.6
2	958.5	845.3	171.4	192.1	607.7	624.1	44.8	43.1	18.9	22.1	53.3	51.6
3	979.8	1023.1	148.6	171.8	653.3	686	49.8	42.9	18.3	19.1	53.1	51
0	847.1	734.4	213.7	201.8	573.2	515	49.4	43.3	13.3	10	29.2	25.2
1	867.3	917.4	238.6	253.2	601.4	615.8	50.3	50.6	11.8	12.7	28.6	29.7
2	968	1002.3	241.5	280.7	694.5	671.1	54.3	53.2	14.4	14.9	33.1	30.9
3	991.4	1024.4	248.5	274.6	698.7	703.8	56.2	61	12.4	14.1	32.8	32.7
0	804.3	793.7	308.6	323.1	495	448.8	49.8	51	20.8	23	38.2	42.1
1	805.7	831.4	249	391.5	505	415.5	50.4	49.5	15.4	28.2	33.1	38.7
2	872.2	873.5	275.1	379.6	555.2	491.9	51.4	63.3	18.1	29	38.6	41.3
3	888.8	880.6	285.8	358.3	576.1	526.8	49.1	52.9	18.8	28.1	38.2	36.8
0	1018.9	1052.3	227	227.2	666.7	662.9	38.3	40.8	16.3	13.1	26.4	29.2
1	1025.4	910.5	233.8	273.6	670.6	578.1	38.3	37.9	18.1	19.2	26.3	26.2
2	1038.5	1109.6	279.3	227.4	703.9	655.1	36.6	43	20	13.1	26.8	28.4
3	1043.1	1140.1	225.5	258.7	763.5	623.6	34.9	42.4	17.4	15.5	29.1	29.8
0	839	824.5	179.5	189.1	544.4	505.4	31.1	29.9	14.5	13.8	29.2	26.3
1	895.6	864.9	158	218.6	573.2	524.9	32.8	33.3	12.8	16.8	30.2	29.7
2	987.4	943.9	125.6	214.6	636.7	568.3	36.8	32.8	12.8	15.3	35.3	33.3
3	990.5	953.3	186.3	265.1	667.3	589.7	35.8	35.9	14.8	20.5	37.4	37.4
0	844.2	843	72.4	82.7	656.9	562.5	39.7	41.5	6.7	7.9	28.7	27.6
1	857.5	770.5	122.1	167.2	665.4	486.7	40.9	45.7	9	14.4	28.4	25.2
2	937.3	928.9	133.3	91.2	700.6	633.4	41.8	44.6	10.6	8.8	29.6	28.4
3	921.2	938.1	116.5	125.7	717	644.3	43.2	44.4	9.6	9.8	29.8	30.4
0	780.5	790.5	213.8	278.8	536.3	493.2	69.4	66.3	21.8	27.3	36.5	29.8
1	808.8	735.6	204.6	247.1	568.8	531.8	69.1	58.9	25	23.6	39.3	35
2	881.6	909.7	226.3	320.5	616.4	553.9	74.1	73	25.7	30	43.3	35.1
3	892.3	903.2	225.5	318.2	596.8	543.9	77.4	72.2	24.4	28.6	37.8	34.3
0	935	921	179.9	259.6	557.4	518.4	50.5	40.2	17.7	30.6	29.3	28.4
1	957.5	921.2	159.7	279.7	585	515.3	52.1	38.4	19.9	32.7	30.5	26.5
2	1006.8	913.5	232.5	317.9	518.6	503.6	57.4	41.1	24.8	39	28	26.3
3	1042.1	945.5	164.9	444	587.6	555.9	62.5	63.2	20.8	57.9	29.8	27.3
0	781.7	783	186.8	207.2	552.9	538.3	43.2	38.1	21.6	20.9	32.9	32.2
1	709.1	791.7	248.5	173.3	458.2	453.9	42.5	41.3	23.5	15.8	27.6	26.9
2
3	891.3	880.1	188.3	263	612.2	592	46.3	42.3	16.7	22.9	35.2	34.9
0	1002.6	1010.4	132.5	128	615.1	644.5	54.8	65.5	23	14.5	31.7	31.5
1	1023.4	1044.2	122.9	121.6	708.6	661.2	62.9	68.8	15.8	15.3	34.3	31.8
2	1061.3	1034.2	135.4	171.5	718.9	525.1	63	71	28.5	20.5	35.5	25.5
3	1054.8	1068.7	148.7	162.9	711	685.4	59.6	69.1	19.9	15.4	32.9	32.4
